# Supplementary material
Source: Frontiers journal article supplement (https://www.frontiersin.org/articles/140500)
Supplement: Data_Sheet_1.PDF [file Data_Sheet_1.PDF]

## *Supplementary Material*

### **The relationship of speech intelligibility with hearing sensitivity, cognition, and perceived hearing difficulties varies for different speech perception tests**

**Antje Heinrich<sup>1\*</sup>, Helen Henshaw<sup>2</sup>, Melanie A. Ferguson<sup>2,3</sup>**

<sup>1</sup>Medical Research Council Institute of Hearing Research, Nottingham, UK, <sup>2</sup>National Institute for Health Research-Nottingham Hearing Biomedical Research Unit, Otology and Hearing Group, Division of Clinical Neuroscience, School of Medicine, University of Nottingham, Nottingham, UK, <sup>3</sup>Nottingham University Hospitals NHS Trust, Nottingham, UK

\* **Correspondence:** Dr Antje Heinrich, MRC Institute of Hearing Research, University Park, Nottingham, NG7 2RD, UK  
[antje.heinrich@ihr.ac.uk](mailto:antje.heinrich@ihr.ac.uk)

#### **1. Supplementary Data**

To provide the reader with full results, Table 1 reports bivariate correlations between all speech and cognitive tests. As three of the four speech tests demonstrated significant correlations with hearing (BEA), Table 2 provides the same correlation correlations with hearing thresholds partialled out. Both tables demonstrate a consistent pattern of results, with only sentence perception and DTT<sub>VS</sub> showing significant correlations with cognitive tests. In particular, two of the significant correlations between cognitive tests and sentence perception (Matrix Reasoning, TEA6) are significantly higher than for DTT<sub>VS</sub>, in the case of nonverbal IQ (Matrix Reasoning) exclusively so. Conversely, the significant correlation of DTT<sub>VS</sub> with the dual task decrement (DTD) was significant higher only than the correlation of DTD with sentence perception.

**Supplementary Table 1.** Simple Pearson product-moment correlations between each of four speech tests, age, hearing and cognitive tests. PD = Phoneme discrimination, Digit Triplet Test with variable speech (DTT<sub>VS</sub>) or variable noise (DTT<sub>VN</sub>), ASL = Adaptive Sentence List. BEA = better ear average<sub>(0.5-4kHz)</sub>, NVIQ = nonverbal intelligence quotient, VLM = visual letter monitoring, RT=reaction time, TEA=Test of Everyday Attention, DTD (dual-task decrement). Significant correlations are shaded. † $p \leq 0.07$ , \* $p < 0.05$ , \*\* $p < 0.01$ . ‘Diff significant’ denotes speech tests for which the correlation with a particular cognitive test differed reliably based on their z-values ( $p_{\text{(one-sided)}} < 0.05$ ). Typically, a difference in correlation of approximately  $r = 0.3$  was required for the change to become statistically significant.

|           |           |                           |               | Speech tests |                   |                   |        | Diff significant  |                                              |
|-----------|-----------|---------------------------|---------------|--------------|-------------------|-------------------|--------|-------------------|----------------------------------------------|
|           |           |                           |               | PD           | DTT <sub>VS</sub> | DTT <sub>VN</sub> | ASL    | DTT <sub>VS</sub> | ASL                                          |
| Age       |           | r                         |               | .17          | .15               | .07               | .19    |                   |                                              |
|           |           | N                         |               | 43           | 44                | 44                | 44     |                   |                                              |
| Hearing   |           | BEA <sub>(0.5-4kHz)</sub> |               | .28          | .49**             | .44**             | .39**  |                   |                                              |
|           |           | N                         |               | 43           | 44                | 44                | 44     |                   |                                              |
| Cognition | NVIQ      | Matrix Reasoning          |               | -.12         | -.02              | -.07              | -.27   | ASL               | DTT <sub>VS</sub>                            |
|           |           | N                         |               | 43           | 44                | 44                | 44     |                   |                                              |
|           |           | Working memory            | Digit span    | Forward      | -.12              | -.07              | -.09   | -.20              |                                              |
|           | N         |                           |               | 43           | 44                | 44                | 44     |                   |                                              |
|           | Backward  |                           |               | -.19         | -.13              | -.14              | -.32*  |                   |                                              |
|           | N         |                           |               | 43           | 44                | 44                | 44     |                   |                                              |
|           | VLM       | Accuracy (Hits)           | -.09          | -.13         | -.10              | .02               |        |                   |                                              |
|           |           |                           | N             | 39           | 40                | 40                | 40     |                   |                                              |
|           |           |                           | Speed (RT) ms | -.09         | .00               | .00               | -.15   |                   |                                              |
|           |           |                           | N             | 39           | 40                | 40                | 40     |                   |                                              |
|           | Attention | TEA                       | Subtest 6     | .00          | -.04              | -.05              | -.38** | ASL               | PD<br>DTT <sub>VS</sub><br>DTT <sub>VN</sub> |
|           |           |                           |               | N            | 42                | 43                | 43     | 43                |                                              |
|           |           |                           | Subtest 7     | -.10         | -.26              | -.22              | -.29†  |                   |                                              |
|           |           |                           |               | N            | 42                | 43                | 43     | 43                |                                              |
|           |           |                           | DTD           | .12          | .29†              | .24               | .08    |                   |                                              |
| N         |           |                           |               | 42           | 43                | 43                | 43     |                   |                                              |

**Supplementary Table 2.** Pearson product-moment correlations between the four speech tests and cognitive tests with hearing (BEA) partialled out. Acronyms as Table 1. Significant correlations ( $p < .05$ ) are shaded. † $p \leq 0.07$ , \* $p < 0.05$ , \*\* $p < 0.01$ . ‘Diff significant’ denotes speech tests for which the correlation with a particular cognitive test differed reliably based on their z-values ( $p_{\text{(one-sided)}} < 0.05$ ). Typically, a difference in correlation of approximately  $r = 0.3$  was required for the change to become statistically significant.

|           |                |                  |                 | Correlation |                   |                   |       | Diff significant  |                   |
|-----------|----------------|------------------|-----------------|-------------|-------------------|-------------------|-------|-------------------|-------------------|
|           |                |                  |                 | PD          | DTT <sub>VS</sub> | DTT <sub>VN</sub> | ASL   | DTT <sub>VS</sub> | ASL               |
| Cognition | NVIQ           | Matrix Reasoning |                 | -.14        | -.06              | -.11              | -.32* | ASL               | DTT <sub>VS</sub> |
|           |                | N                |                 | 40          | 41                | 41                | 41    |                   |                   |
|           | Working memory | Digit span       | Forward         | -.13        | -.09              | -.11              | -.23  |                   |                   |
|           |                |                  | N               | 40          | 41                | 41                | 41    |                   |                   |
|           |                |                  | Backward        | -.16        | -.08              | -.09              | -.29† |                   |                   |
|           |                |                  | N               | 40          | 41                | 41                | 41    |                   |                   |
|           |                | VMT              | Accuracy (Hits) | -.03        | -.03              | .00               | .12   |                   |                   |
|           |                |                  | N               | 36          | 37                | 37                | 37    |                   |                   |
|           |                |                  | Speed (RT)      | -.03        | .11               | .11               | -.08  |                   |                   |
|           |                |                  | N               | 36          | 37                | 37                | 37    |                   |                   |
|           | Attention      | TEA              | Subtest 6       | .04         | .05               | .02               | -.36* | ASL               | PD                |
|           |                |                  | N               | 39          | 40                | 40                | 40    |                   | DTT <sub>VS</sub> |
|           |                |                  |                 |             |                   |                   |       |                   | DTT <sub>VN</sub> |
|           |                |                  | Subtest 7       | -.08        | -.26              | -.21              | -.29† |                   |                   |
|           |                |                  | N               | 39          | 40                | 40                | 40    |                   |                   |
|           |                |                  | DTD             | .13         | .35*              | .27               | .09   | ASL               | DTT <sub>VS</sub> |
| N         | 39             | 40               | 40              | 40          |                   |                   |       |                   |                   |

**Supplementary Table 3.** Correlation and standardized canonical coefficients between BEA / cognition (single latent factor “Cogn”) and the four speech tests.

|                   | First canonical correlation |                      | Second canonical correlation |                      |
|-------------------|-----------------------------|----------------------|------------------------------|----------------------|
|                   | Correlation                 | Coefficient (weight) | Correlation                  | Coefficient (weight) |
| BEA               | .90                         | .84                  | -.44                         | -.55                 |
| Cognition (Cogn)  | -.55                        | -.44                 | -.84                         | -.91                 |
|                   |                             |                      |                              |                      |
| PD                | .57                         | .21                  | -.01                         | .03                  |
| DTT <sub>VS</sub> | .89                         | .20                  | -.36                         | -.65                 |
| DTT <sub>VN</sub> | .82                         | .32                  | -.45                         | -.55                 |
| ASL               | .88                         | .50                  | .45                          | 1.15                 |

**Supplementary Table 4.** Correlation and standardized canonical coefficients between self-report variables and the four speech tests.

|                   | First canonical correlation |                      | Second canonical correlation |                      |
|-------------------|-----------------------------|----------------------|------------------------------|----------------------|
|                   | Correlation                 | Coefficient (weight) | Correlation                  | Coefficient (weight) |
| Q6-10             | -.80                        | -.63                 | -.41                         | -.56                 |
| ALDQ              | .60                         | .53                  | -.27                         | -.33                 |
| GHABP             | -.50                        | -.28                 | .49                          | 1.03                 |
| SSQ               | -.39                        | -.10                 | -.26                         | -.68                 |
|                   |                             |                      |                              |                      |
| PD                | .10                         | -.12                 | -.08                         | -.49                 |
| DTT <sub>VS</sub> | .64                         | -.40                 | .15                          | .68                  |
| DTT <sub>VN</sub> | .93                         | 1.06                 | -.20                         | -1.14                |
| ASL               | .68                         | .41                  | .63                          | 1.00                 |
